# Supplementary material
Source: publisher figshare collection journal article supplement (https://acs.figshare.com/ndownloader/files/13283924)

# Discovery of RG7834: The First-in-Class Selective and Orally Available Small Molecule Hepatitis B Virus Expression Inhibitor with Novel Mechanism of Action

Xingchun Han,<sup>†</sup> Chengang Zhou,<sup>†</sup> Min Jiang,<sup>†</sup> Yongguang Wang,<sup>†</sup> Jianhua Wang,<sup>†</sup> Zhanling Cheng,<sup>†</sup> Min Wang,<sup>†</sup> Yongqiang Liu,<sup>†</sup> Chungeng Liang,<sup>†</sup> Jianping Wang,<sup>†</sup> Zhanguo Wang,<sup>†</sup> Robert Weikert,<sup>‡</sup> Wenzhe Lv,<sup>&</sup> Jianxun Xie,<sup>&</sup> Xin Yu,<sup>†</sup> Xue Zhou,<sup>†</sup> Souphalone Luangsay,<sup>§</sup> Hong C. Shen,<sup>†</sup> Alexander V. Mayweg,<sup>†</sup> Hassan Javanbakht,<sup>§</sup> Song Yang<sup>\*,†</sup>

*Department of <sup>†</sup>Medicinal Chemistry, <sup>&</sup>Pharmaceutical Sciences, <sup>‡</sup>Discovery Virology, Roche Innovation Center Shanghai, Roche Pharma Research and Early Development, Bld 5, 720 Cailun Road, Shanghai, 201203 China,*

*Department of <sup>‡</sup>Medicinal Chemistry, <sup>§</sup>Discovery Virology, Roche Innovation Center Basel, Roche Pharma Research and Early Development, Grenzacherstrasse 124, CH-4070 Basel, Switzerland*

## Support information

### Content

1. Synthesis of compounds **16**, **17**, **18** and **35**
2. X-ray Crystal Structure of (S)-**22**
3. X-ray Crystal Structure of RG7834
4. <sup>1</sup>H NMR and <sup>13</sup>C NMR Spectra of RG7834

## 1. Synthesis of compounds 16, 17, 18 and 35

### 9-(dimethylamino)-6-methyl-2-oxo-6,7-dihydrobenzo[a]quinolizine-3-carboxylic acid (16)

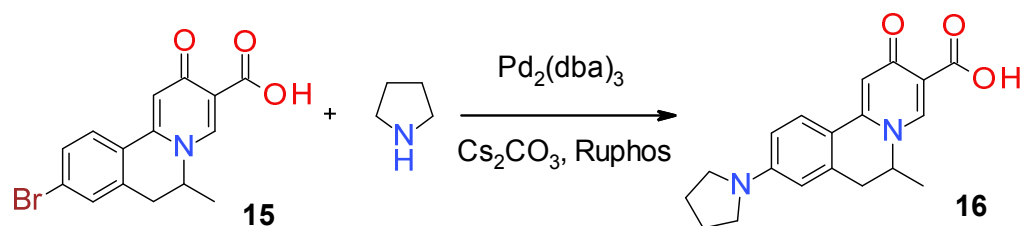

To a solution of 9-bromo-6-methyl-2-oxo-6,7-dihydrobenzo[a]quinolizine-3-carboxylic acid (100 mg, 0.30 mmol) in Dioxane (3 mL) was added pyrrolidine (32 mg),  $\text{Cs}_2\text{CO}_3$  (195 mg, 0.60 mmol),  $\text{Pd}_2(\text{dba})_3$  (27.5 mg, 0.03 mmol) and Ruphos (28 mg, 0.06 mmol), the reaction was stirred for one hour at 120 °C under atmosphere of argon and microwave irradiation. After LCMS indicated the starting material was consumed completely, the reaction mixture was cooled to room temperature and filtered. The filtrate was washed with brine and extracted with ethyl acetate (50 mL). The organic layer was concentrated in vacuum and the residue was purified by preparative HPLC to 6-methyl-2-oxo-9-pyrrolidin-1-yl-6,7-dihydrobenzo[a]quinolizine-3-carboxylic acid (4 mg).  $^1\text{H}$  NMR (400 MHz,  $\text{METHANOL-}d_4$ )  $\delta$  ppm 8.76 (br s, 1 H), 7.80 (d, 1H), 7.23 (br s, 1H), 6.81 (dd, 1H) 6.69 (d, 1H), 3.42 - 3.55 (m, 1H), 3.12 (s, 6H), 2.95 (br m, 1H), 2.72 (s, 1H), 1.34 (d, 3H). MS obsd. ( $\text{ESI}^+$ )  $[(\text{M}+\text{H})^+]$ : 299.

### 6-methyl-2-oxo-9-pyrrolidin-1-yl-6,7-dihydrobenzo[a]quinolizine-3-carboxylic acid (17)

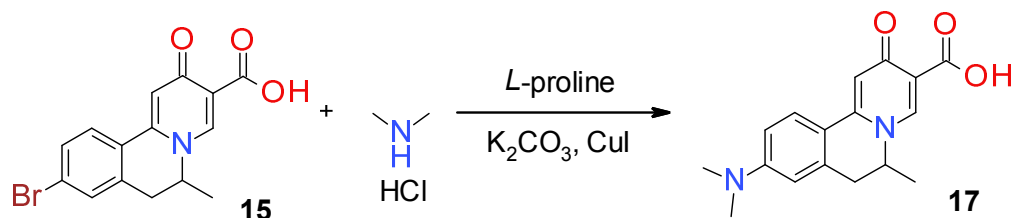

To a solution of 9-bromo-6-methyl-2-oxo-6,7-dihydrobenzo[a]quinolizine-3-carboxylic acid (100 mg, 0.30 mmol) in DMSO (3 mL) was added Dimethylamine hydrochloride (7.2 mg, 0.9 mmol),  $\text{K}_2\text{CO}_3$  (208 mg, 0.15 mmol),  $\text{CuI}$  (5.7 mg, 0.03 mmol) and  $\text{L-proline}$  (6.9 mg, 0.06 mmol), the reaction was stirred for 18 hours at 100 °C under atmosphere of argon. After LCMS indicated the starting material was consumed completely, the reaction mixture was cooled to room temperature and filtered. The filtrate was washed with brine and extracted with ethyl acetate (50 mL). The organic layer was concentrated in vacuum and the residue was purified by Preparative HPLC to give 9-(dimethylamino)-6-methyl-2-oxo-6,7-dihydrobenzo[a]quinolizine-3-carboxylic acid (5 mg).  $^1\text{H}$  NMR (400 MHz,  $\text{METHANOL-}d_4$ )  $\delta$  ppm 8.69

(s, 1H), 7.74 (d, 1H), 7.44 (br s, 1H), 7.16 (s, 1H), 6.64 (dd, 1H), 6.50 (d, 1H), 3.37 - 3.53 (m, 4H), 3.21 (m, 1H), 2.92 (m, 1H), 2.04 - 2.18 (m, 3H), 1.29 - 1.41 (m, 4H). MS obsd. (ESI<sup>+</sup>) [(M+H)<sup>+</sup>]: 325.

**6-methyl-9-(methylamino)-2-oxo-6,7-dihydrobenzo[a]quinolizine-3-carboxylic acid (18)**

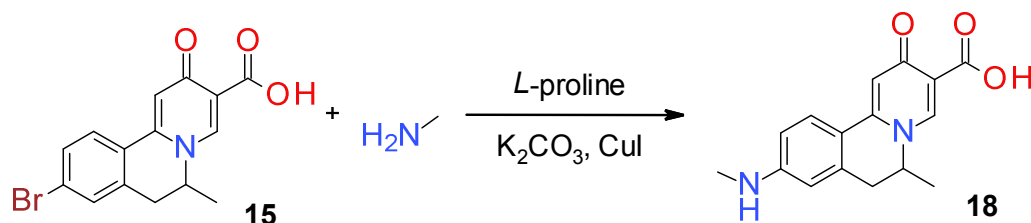

To a solution of 9-bromo-6-methyl-2-oxo-6,7-dihydrobenzo[a]quinolizine-3-carboxylic acid (100 mg, 0.30 mmol) in DMSO (3 mL) was added the solution of methylamine in MeOH (7N, 2 mL), K<sub>2</sub>CO<sub>3</sub> (82.8 mg, 0.60 mmol), CuI (5.7 mg, 0.03 mmol) and L-proline (6.9 mg, 0.06 mmol), the reaction was stirred for 18 hours at 100 °C under atmosphere of argon. After LCMS indicated the starting material was consumed completely, the reaction mixture was cooled to room temperature and filtered. The filtrate was washed with brine and extracted with ethyl acetate (50 mL). The organic layer was concentrated in vacuum and the residue was purified by Preparative HPLC to give 6-methyl-9-(methylamino)-2-oxo-6,7-dihydrobenzo[a]quinolizine-3-carboxylic acid (48 mg). <sup>1</sup>H NMR (400 MHz, METHANOL-*d*<sub>4</sub>) δ ppm 8.89 (br s, 1H), 7.77 (br d, 1H), 7.35 (br s, 1H), 6.67 (br d, 1H), 6.55 (s, 1H), 4.00 (s, 1H), 3.44 (br d, 1H), 2.87 - 2.93 (m, 1H), 2.89 (s, 3H), 2.68 (s, 1H), 1.36 (br d, 3H). MS obsd. (ESI<sup>+</sup>) [(M+H)<sup>+</sup>]: 285.

**9-cyano-6-ethyl-10-methoxy-2-oxo-6,7-dihydrobenzo[a]quinolizine-3-carboxylic acid (35)**

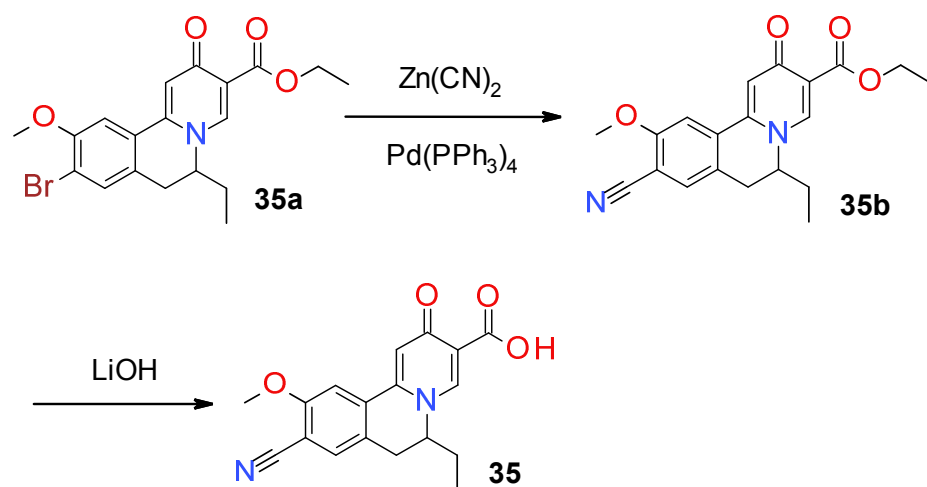

Intermediate **35a** can be obtained through general procedure for the preparation of **G11** mentioned in article.

**Step 1: Preparation of ethyl 9-cyano-6-ethyl-10-methoxy-2-oxo-6,7-dihydrobenzo[a]quinolizine-3-carboxylate (35b)**

To a solution of ethyl 9-bromo-6-ethyl-10-methoxy-2-oxo-6,7-dihydrobenzo[a]quinolizine-3-carboxylate (**35a**, 0.12 g, 0.3 mmol) in DMF (10 mL) was added zinc cyanide (53 mg, 0.45 mmol) and tetrakis(triphenylphosphine) palladium(0) (70 mg, 0.06 mmol). The resultant mixture was stirred at 100 °C for 10 hours. After being cooled to room temperature, the mixture was concentrated under reduced pressure, and the residue was dissolved in ethyl acetate (50 mL). The resultant solution was washed with water (25 mL x 2) and brine, and then dried over anhydrous Na<sub>2</sub>SO<sub>4</sub> and then concentrated to give ethyl 9-cyano-6-ethyl-10-methoxy-2-oxo-6,7-dihydrobenzo[a]quinolizine-3-carboxylate (100 mg) which was used in the next step without purification.

**Step 2: Preparation of 9-cyano-6-ethyl-10-methoxy-2-oxo-6,7-dihydrobenzo[a]quinolizine-3-carboxylic acid (35)**

To a solution of ethyl 9-cyano-6-ethyl-10-methoxy-2-oxo-6,7-dihydrobenzo[a]quinolizine-3-carboxylate (0.1 g, 0.3 mmol) in THF (2 mL) and methanol (6 mL) was added 1.0 M LiOH (0.9 mL) aqueous solution at room temperature. The resultant mixture was stirred for 4 hours, and then acidified to pH 1-2 with 2 M hydrochloric acid. The mixture was extracted with DCM (50 mL x 2), and the combined organic layers were washed with brine, and then dried over anhydrous Na<sub>2</sub>SO<sub>4</sub> and then concentrated to give a yellow solid, which was purified by prep-HPLC to give 9-cyano-6-ethyl-10-methoxy-2-oxo-6,7-dihydrobenzo[a]quinolizine-3-carboxylic acid (6 mg). <sup>1</sup>H NMR (400 MHz, DMSO-*d*<sub>6</sub>): δ ppm 16.35 (s, 1H), 8.91 (s, 1H), 7.86 (s, 1H), 7.82 (s, 1H), 7.79 (s, 1H), 4.80 (m, 1H), 4.10 (s, 3H), 3.35 (m, 1H) 3.11 (m, 1H), 1.41 (m, 2H), 0.80 (t, 3H). MS obsd. (ESI<sup>+</sup>) [(M+H)<sup>+</sup>]: 325.

**2. X-ray Crystal Structure of (S)-22.**

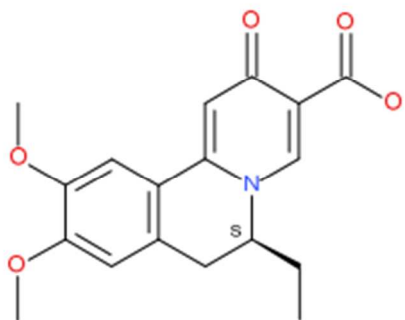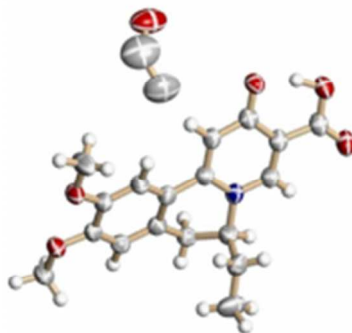

**Figure S1.** X-ray crystal structure of (*S*)-22

|                                         |                                                                                                             |
|-----------------------------------------|-------------------------------------------------------------------------------------------------------------|
| <b>Empirical formula</b>                | C <sub>19</sub> H <sub>19</sub> N O <sub>5.50</sub>                                                         |
| <b>Formula weight</b>                   | 349.35                                                                                                      |
| <b>Temperature</b>                      | 160(2) K                                                                                                    |
| <b>Wavelength</b>                       | 1.54178 Å                                                                                                   |
| <b>Crystal system, space group</b>      | Orthorhombic, P2(1)2(1)2(1)                                                                                 |
| <b>Unit cell dimensions</b>             | a = 11.93780(10) Å alpha = 90 deg.<br>b = 12.27040(10) Å beta = 90 deg.<br>c = 24.9356(2) Å gamma = 90 deg. |
| <b>Volume</b>                           | 3652.61(5) Å <sup>3</sup>                                                                                   |
| <b>Z, Calculated density</b>            | 8, 1.271 Mg/m <sup>3</sup>                                                                                  |
| <b>Absorption coefficient</b>           | 0.781 mm <sup>-1</sup>                                                                                      |
| <b>F(000)</b>                           | 1472                                                                                                        |
| <b>Crystal size</b>                     | 0.40 x 0.15 x 0.10 mm                                                                                       |
| <b>Theta range for data collection</b>  | 3.54 to 66.50 deg.                                                                                          |
| <b>Limiting indices</b>                 | -14 ≤ h ≤ 14, -14 ≤ k ≤ 14, -29 ≤ l ≤ 29                                                                    |
| <b>Reflections collected / unique</b>   | 115261 / 6418 [R(int) = 0.0369]                                                                             |
| <b>Completeness to theta = 66.71</b>    | 99.8 %                                                                                                      |
| <b>Absorption correction</b>            | Semi-empirical from equivalents                                                                             |
| <b>Max. and min. transmission</b>       | 1.00000 and 0.87885                                                                                         |
| <b>Refinement method</b>                | Full-matrix least-squares on F <sup>2</sup>                                                                 |
| <b>Data / restraints / parameters</b>   | 6418 / 0 / 612                                                                                              |
| <b>Goodness-of-fit on F<sup>2</sup></b> | 1.081                                                                                                       |
| <b>Final R indices [I &gt; 2σ(I)]</b>   | R <sub>1</sub> = 0.0309, wR <sub>2</sub> = 0.0911                                                           |

|                                     |                                    |
|-------------------------------------|------------------------------------|
| <b>R indices (all data)</b>         | R1 = 0.0314, wR2 = 0.0916          |
| <b>Absolute structure parameter</b> | -0.02(12)                          |
| <b>Largest diff. peak and hole</b>  | 0.504 and -0.171 e.Å <sup>-3</sup> |

### 3. X-ray Crystal Structure of RG7834

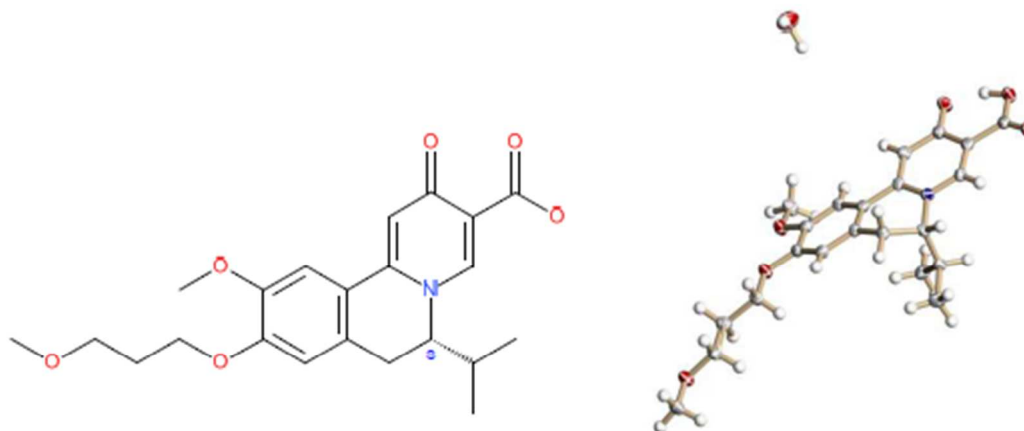

**Figure S2.** X-ray crystal structure of 64S.

|                                        |                                                                                                           |
|----------------------------------------|-----------------------------------------------------------------------------------------------------------|
| <b>Empirical formula</b>               | C <sub>22</sub> H <sub>29</sub> N O <sub>7</sub>                                                          |
| <b>Formula weight</b>                  | 419.46                                                                                                    |
| <b>Temperature</b>                     | 100(2) K                                                                                                  |
| <b>Wavelength</b>                      | 1.54184 Å                                                                                                 |
| <b>Crystal system, space group</b>     | Monoclinic, P2(1)                                                                                         |
| <b>Unit cell dimensions</b>            | a = 9.30570(10) Å α = 90 deg.<br>b = 11.73100(10) Å β = 95.1650(10) deg.<br>c = 9.39180(10) Å γ = 90 deg. |
| <b>Volume</b>                          | 1021.095(18) Å <sup>3</sup>                                                                               |
| <b>Z, Calculated density</b>           | 2, 1.364 Mg/m <sup>3</sup>                                                                                |
| <b>Absorption coefficient</b>          | 0.842 mm <sup>-1</sup>                                                                                    |
| <b>F(000)</b>                          | 448                                                                                                       |
| <b>Crystal size</b>                    | 0.50 x 0.50 x 0.40 mm                                                                                     |
| <b>Theta range for data collection</b> | 4.73 to 66.71 deg.                                                                                        |
| <b>Limiting indices</b>                | -10 ≤ h ≤ 11, -13 ≤ k ≤ 13, -11 ≤ l ≤ 11                                                                  |

|                                   |                                             |
|-----------------------------------|---------------------------------------------|
| Reflections collected / unique    | 33729 / 3562 [R(int) = 0.0276]              |
| Completeness to theta = 66.71     | 99.1 %                                      |
| Absorption correction             | Semi-empirical from equivalents             |
| Max. and min. transmission        | 1.00000 and 0.74149                         |
| Refinement method                 | Full-matrix least-squares on F <sup>2</sup> |
| Data / restraints / parameters    | 3562 / 1 / 287                              |
| Goodness-of-fit on F <sup>2</sup> | 1.048                                       |
| Final R indices [I>2sigma(I)]     | R1 = 0.0223, wR2 = 0.0617                   |
| R indices (all data)              | R1 = 0.0224, wR2 = 0.0618                   |
| Absolute structure parameter      | -0.01(10)                                   |
| Largest diff. peak and hole       | 0.160 and -0.162 e.A <sup>-3</sup>          |

#### 4. <sup>1</sup>H NMR and <sup>13</sup>C NMR Spectra of RG7834

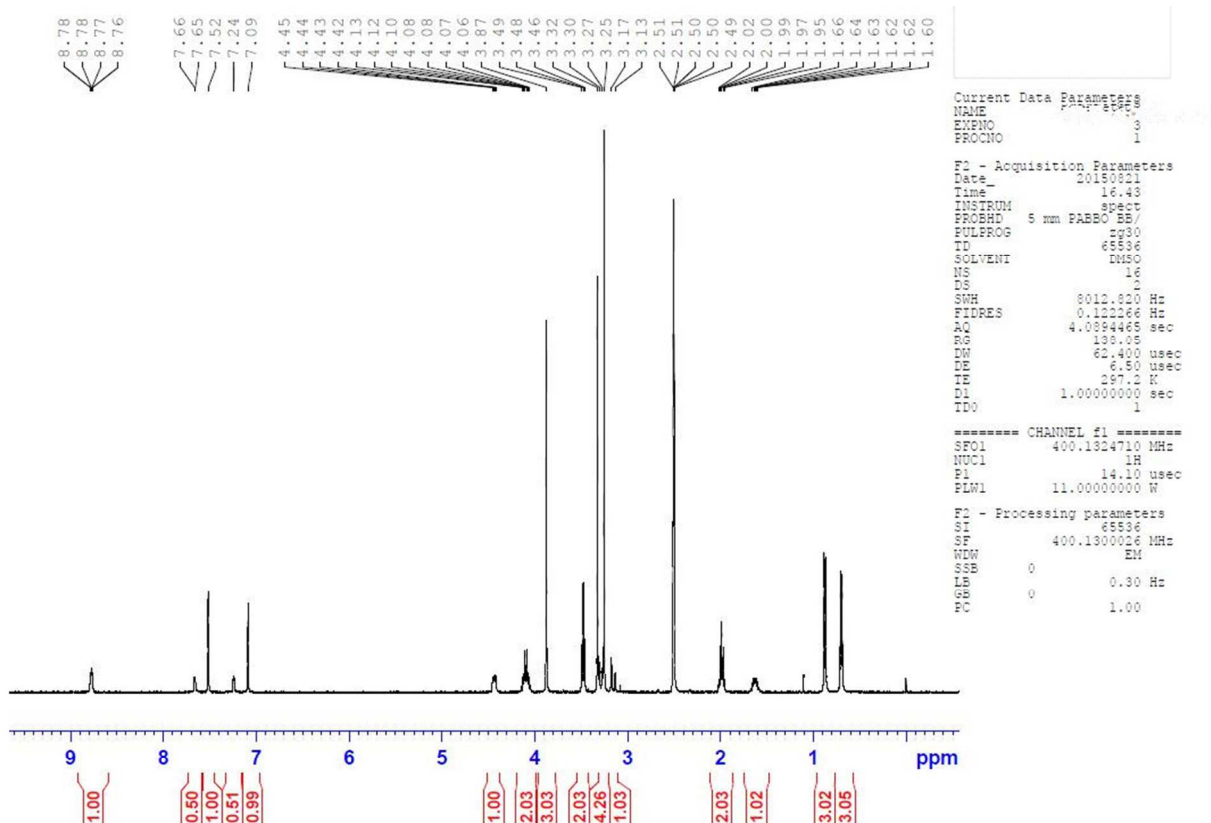

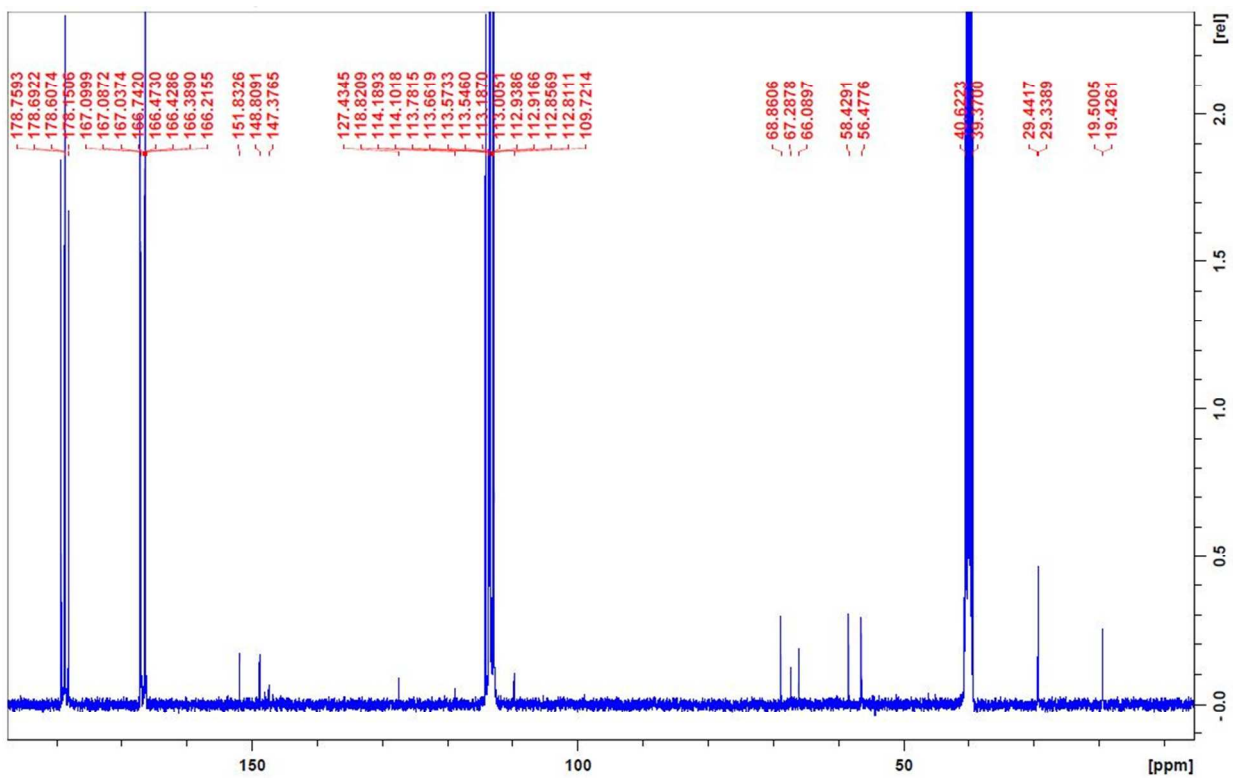

Supplement: Supplementary file 1 [file 13283924]
